# Supplementary material for: Earthquake Magnitude Estimation from High-Rate GNSS Data: A Case Study of the 2021 Mw 7.3 Maduo Earthquake
Source: MDPI journal article supplement (doi:10.3390/rs13214478), 2021-11-08
Supplement: s1 [file s1]

## Supplementary materials to

### Earthquake magnitude estimation from high-rate GNSS data: A case study of the 2021 Mw 7.3 Maduo earthquake

Zhiyu Gao, Yanchuan Li, Xinjian Shan\* and Chuanhua Zhu

#### Introduction:

This supplemental content contains three figures (Figures S1–S3).

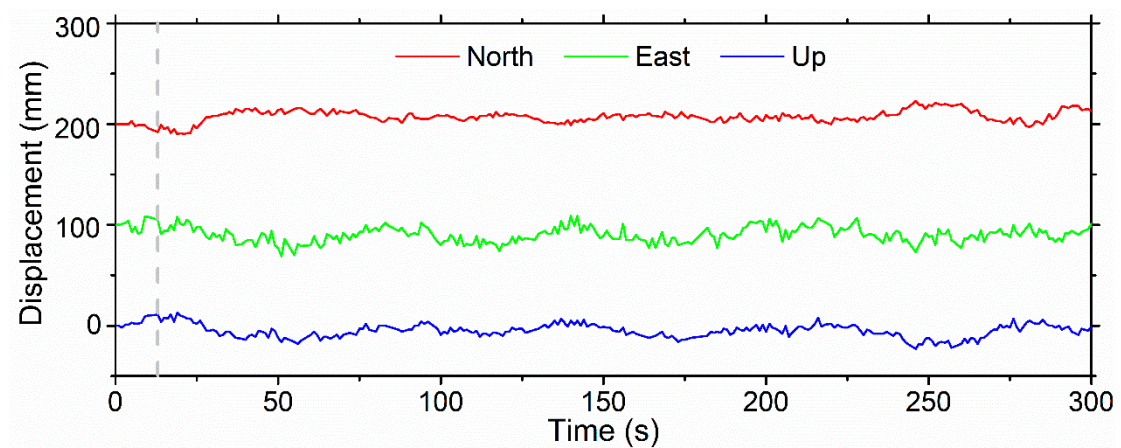

**Figure S1.** Precision point positioning (PPP) results of the reference station using the PRIDE PPP ambiguity resolution code (Geng et al., 2019). Red, green, and blue lines represent the displacement time series in the North, East and Up directions, respectively. The gray dotted line is the time of the earthquake onset, 18:04:13 (UTC) on 21 May 2021.

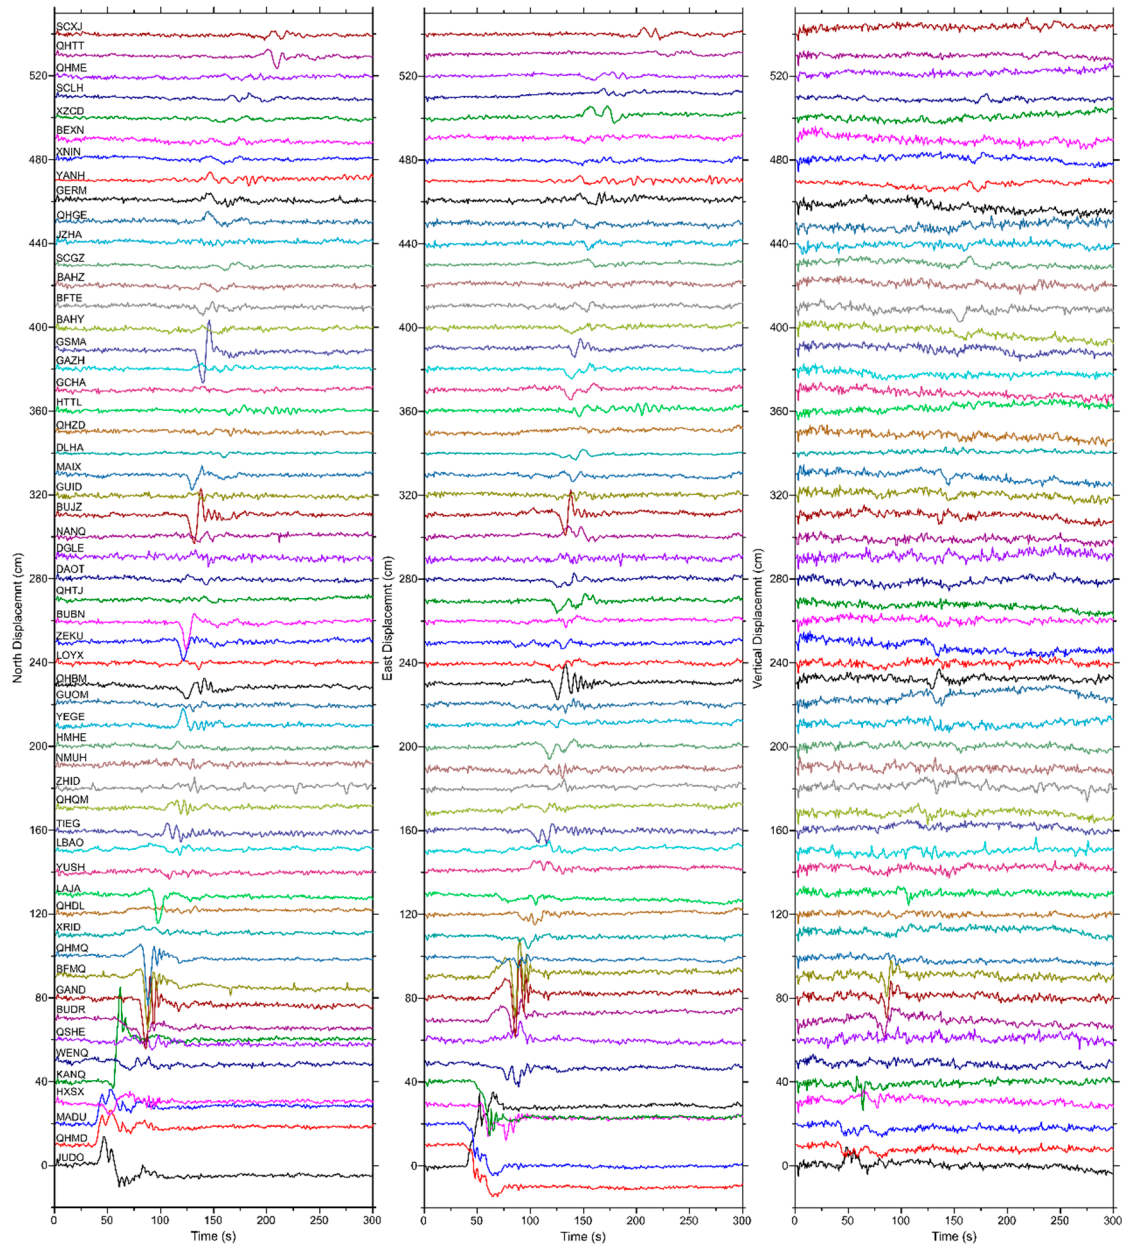

**Figure S2.** Displacement time series results at all high-rate Global Navigation Satellite System (GNSS) stations. Left, middle, and right panel represent the displacement components of north, east and vertical, respectively. The starting time of the X axis is 18:04:00 (UTC) on 21 May 2021.

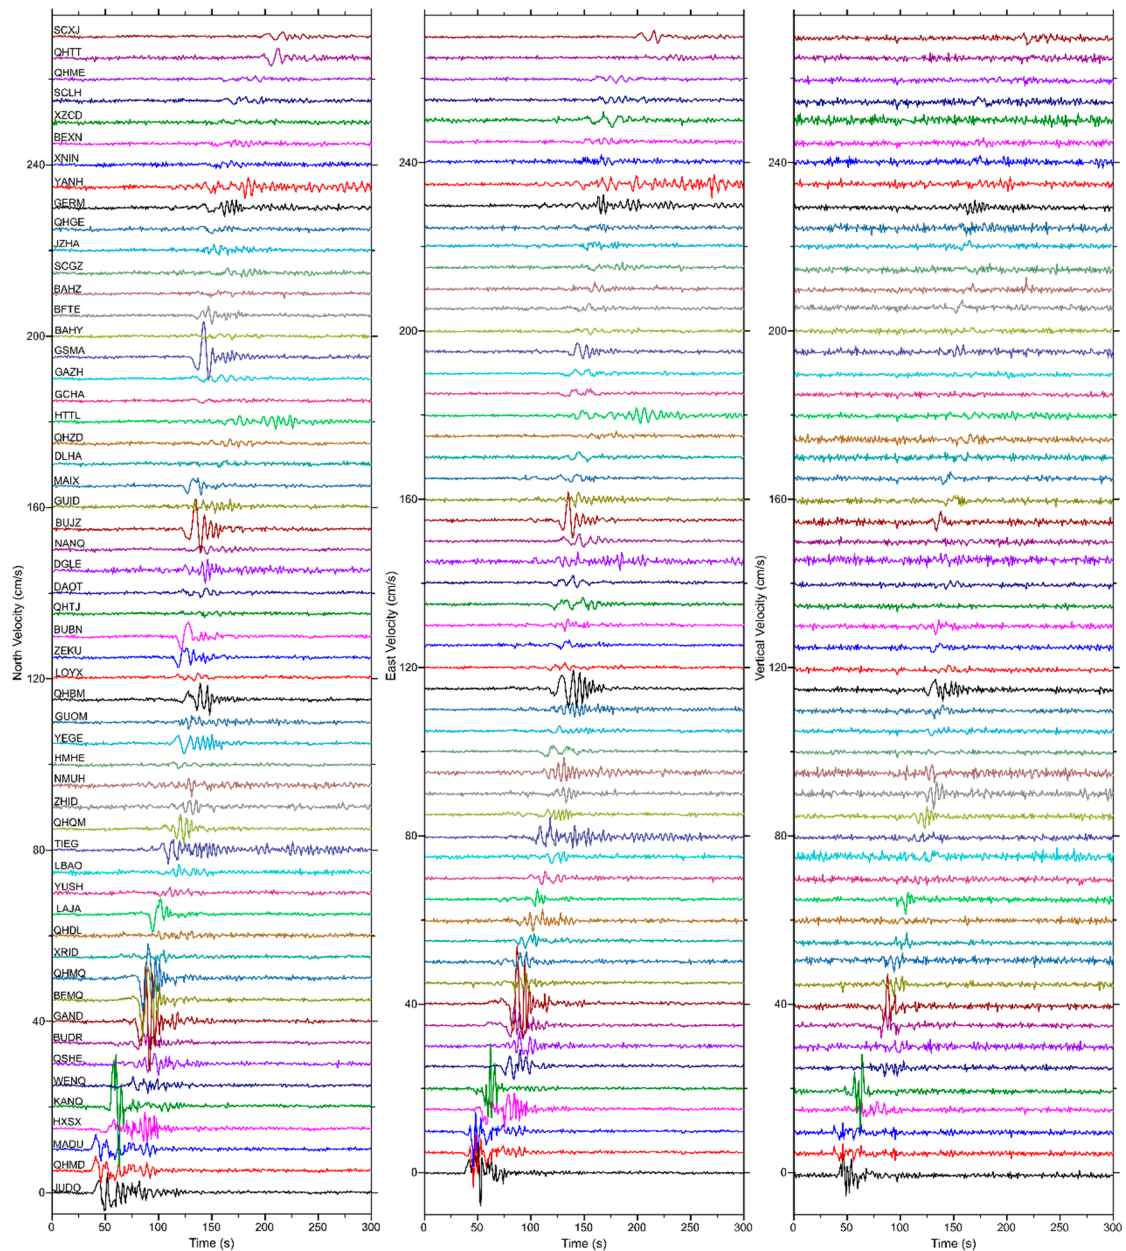

**Figure S3.** Velocity time series results at all high-rate GNSS stations. Left, middle, and right panel represent the velocity components of north, east and vertical, respectively. The starting time of the X axis is 18:04:00 (UTC) on 21 May 2021.

## References

Geng, J.; Chen, X.; Pan, Y.; Mao, S.; Li, C.; Zhou, J.; Zhang, K. PRIDE PPP-AR: An open-source software for GPS PPP ambiguity resolution. *GPS Solut.* **2019**, *23*, 91. <https://doi.org/10.1007/s10291-019-0888-1>
