# Supplementary material for: Earthquake Magnitude Estimation from High-Rate GNSS Data: A Case Study of the 2021 Mw 7.3 Maduo Earthquake
Source: MDPI journal article supplement (doi:10.3390/rs13214478), 2021-11-08
Supplement: s1 [file s1]

Archive with 1 entries (1 files):
- remotesensing-1433897-supplementary.pdf
